# Supplementary material
Source: Springer Nature journal article supplement (https://www.springermedizin.de/resource/supplementary/12958_2011_868_MOESM2_ESM.pdf/9569056)

**A****0 h****18 h****C**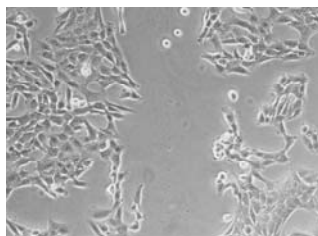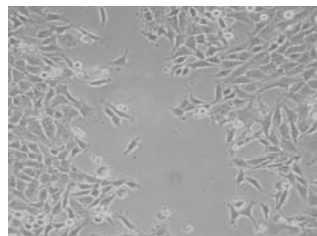**BK**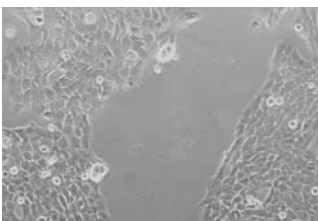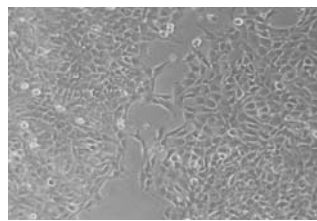**BK + HOE**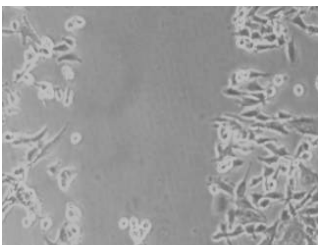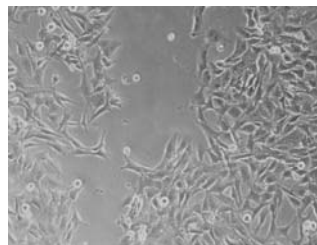**LDBK**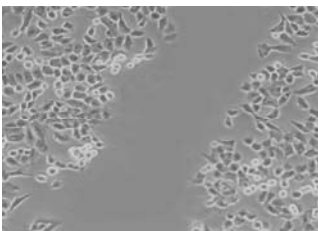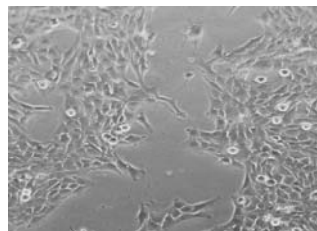**LDBK + AB1R**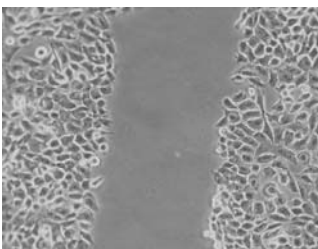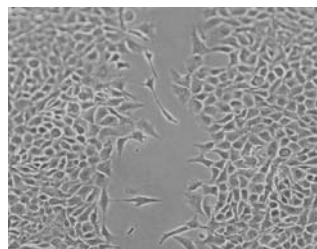**B**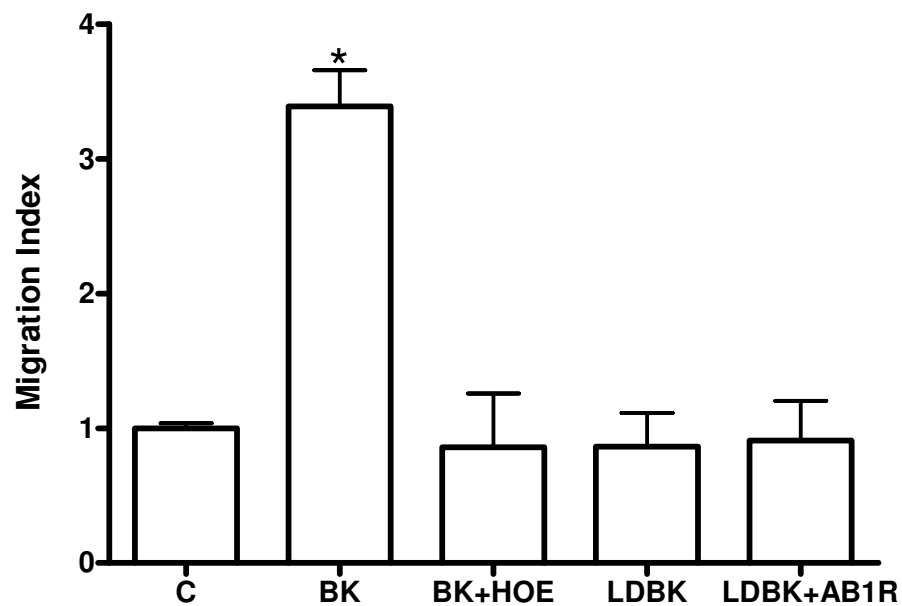**C**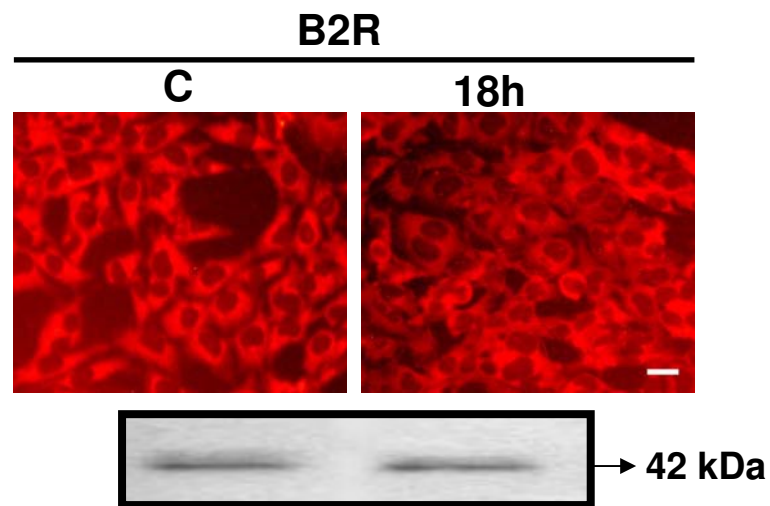

Supplement: MOESM2 [file 9569056]
